# Supplementary material for: Distinguishing active from quiescent disease in ANCA-associated vasculitis using attenuated total reflection Fourier-transform infrared spectroscopy
Source: Springer Nature journal article supplement (doi:10.1038/s41598-021-89344-8), 2021-05-11
Supplement: MOESM1 [file 41598_2021_89344_MOESM1_ESM.pdf]

## Central Lancashire Online Knowledge (CLoK)

|          |                                                                                                                                                                                                                                                                                                                                                                                                                                                                                                |
|----------|------------------------------------------------------------------------------------------------------------------------------------------------------------------------------------------------------------------------------------------------------------------------------------------------------------------------------------------------------------------------------------------------------------------------------------------------------------------------------------------------|
| Title    | Distinguishing active from quiescent disease in ANCA-associated vasculitis using attenuated total reflection Fourier-transform infrared spectroscopy                                                                                                                                                                                                                                                                                                                                           |
| Type     | Article                                                                                                                                                                                                                                                                                                                                                                                                                                                                                        |
| URL      | <a href="https://clock.uclan.ac.uk/id/eprint/37758/">https://clock.uclan.ac.uk/id/eprint/37758/</a>                                                                                                                                                                                                                                                                                                                                                                                            |
| DOI      | <a href="https://doi.org/10.1038/s41598-021-89344-8">https://doi.org/10.1038/s41598-021-89344-8</a>                                                                                                                                                                                                                                                                                                                                                                                            |
| Date     | 2021                                                                                                                                                                                                                                                                                                                                                                                                                                                                                           |
| Citation | Morris, Adam D., Medeiros-De-morais, Camilo De Ielis  ORCID: 0000-0003-2573-787X, Lima, Kássio M. G., Freitas, Daniel L. D., Brady, Mark E., Dhaygude, Ajay P., Rowbottom, Anthony and Martin, Francis L. (2021) Distinguishing active from quiescent disease in ANCA-associated vasculitis using attenuated total reflection Fourier-transform infrared spectroscopy. Scientific Reports, 11 (1). p. 9981. |
| Creators | Morris, Adam D., Medeiros-De-morais, Camilo De Ielis, Lima, Kássio M. G., Freitas, Daniel L. D., Brady, Mark E., Dhaygude, Ajay P., Rowbottom, Anthony and Martin, Francis L.                                                                                                                                                                                                                                                                                                                  |

It is advisable to refer to the publisher's version if you intend to cite from the work.  
<https://doi.org/10.1038/s41598-021-89344-8>

For information about Research at UCLan please go to <http://www.uclan.ac.uk/research/>

All outputs in CLoK are protected by Intellectual Property Rights law, including Copyright law. Copyright, IPR and Moral Rights for the works on this site are retained by the individual authors and/or other copyright owners. Terms and conditions for use of this material are defined in the <http://clock.uclan.ac.uk/policies/>

## **Supplementary Information**

### Distinguishing active from quiescent disease in ANCA-associated vasculitis using attenuated total reflection Fourier-transform infrared spectroscopy

Adam D. Morris<sup>1\*</sup>, Camilo L. M. Morais<sup>2</sup>, Kássio M. G. Lima<sup>3</sup>, Daniel L. D. Freitas<sup>3</sup>, Mark E. Brady<sup>1</sup>, Ajay P. Dhaygude<sup>1</sup>, Anthony W. Rowbottom<sup>4, 5</sup>, Francis L. Martin<sup>6\*</sup>

<sup>1</sup>Renal Medicine, Royal Preston Hospital, Preston, UK

<sup>2</sup>School of Pharmacy and Biomedical Sciences, University of Central Lancashire, Preston, UK

<sup>3</sup>Institute of Chemistry, Biological Chemistry and Chemometrics, Federal University of Rio Grande do Norte, Natal, Brazil

<sup>4</sup>Department of Immunology, Royal Preston Hospital, Preston, UK

<sup>5</sup>School of Medicine, University of Central Lancashire, Preston, UK

<sup>6</sup>Biocel Ltd, Hull HU10 7TS, UK

**No of Pages = 15**

**Number of Figures = 15**

**Number of Tables = 14**

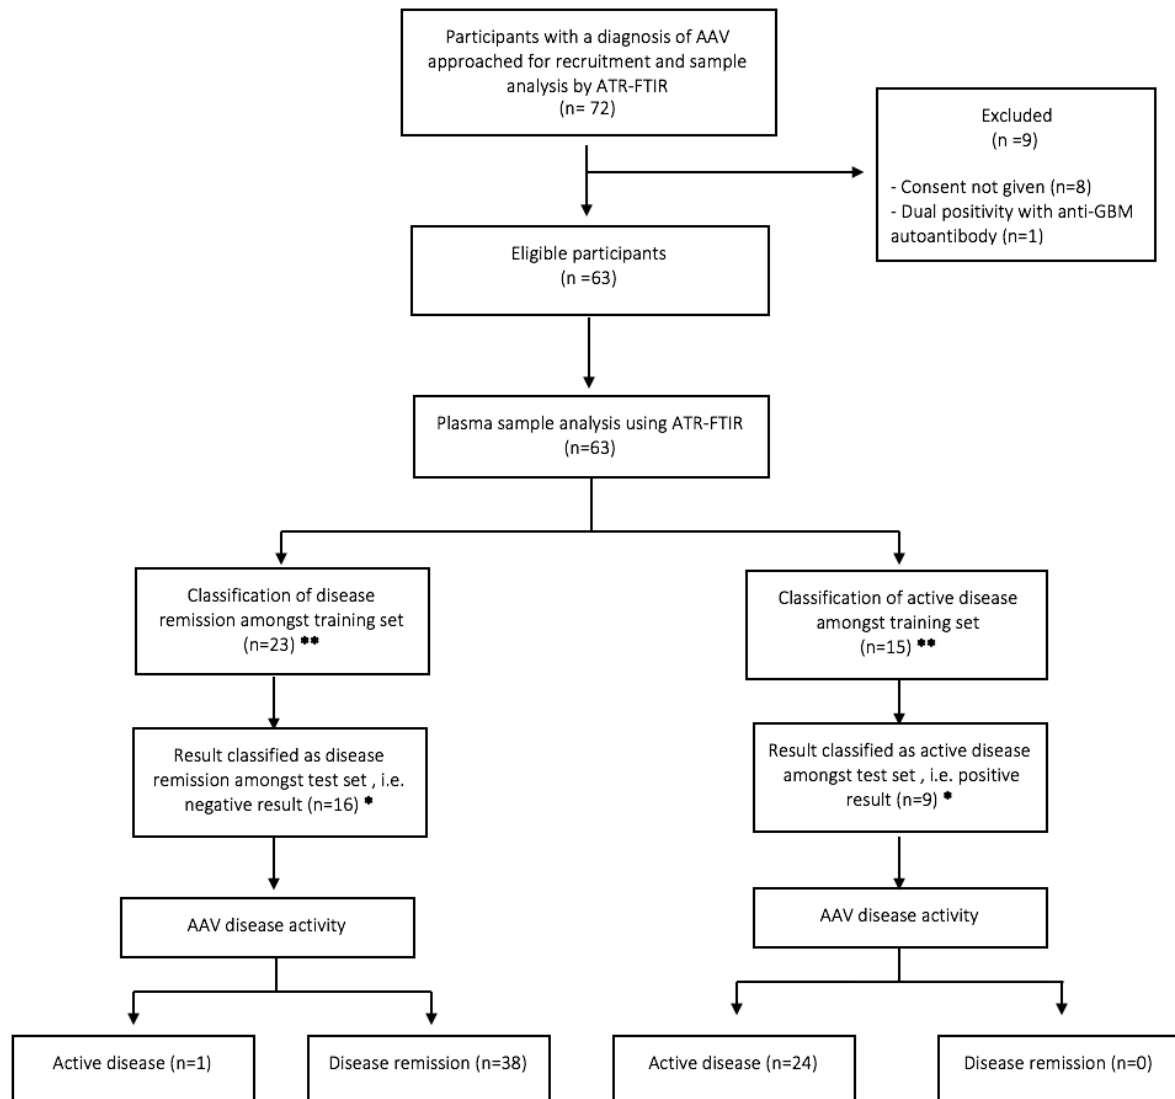

**Figure S1: ANCA-associated vasculitis participant flow** - AAV: ANCA-associated vasculitis, \* Test set – samples used for blind predictive modelling for external validation of the classification systems performance, \*\*Training set – samples used for model construction of classification system

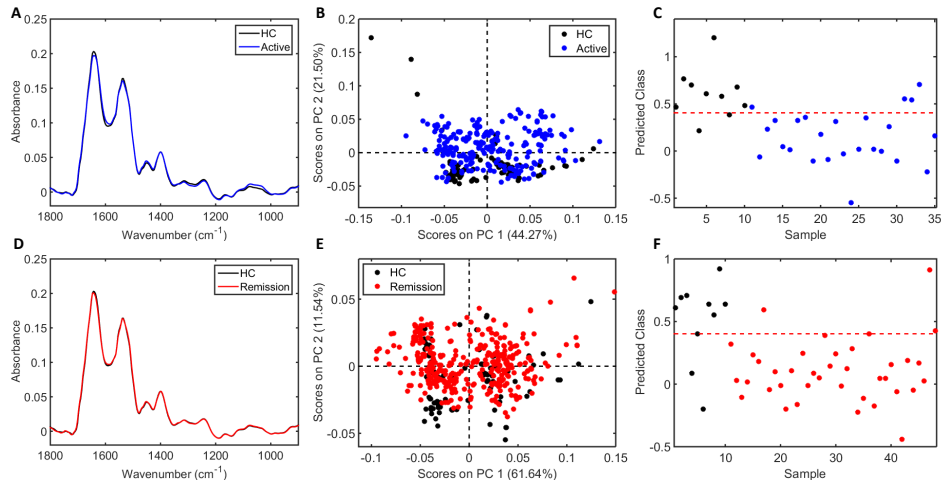

**Figure S2:** ATR-FTIR spectral classification of healthy controls (HC) vs. active disease (AD) & healthy controls (HC) vs. disease remission (DR) for plasma samples – (A) Average pre-processed spectral points for HC (n=100) & patients with AD (n=250) (B) PCA scores plot for HC & AD (C) PLS-DA discriminant function graph for classification of HC & AD using cross validation (D) Average pre-processed spectral points for HC (n=100) & DR (n=380) (E) PCA scores plot for HC & DR (F) PLS-DA discriminant function graph for classification of HC & DR using cross validation

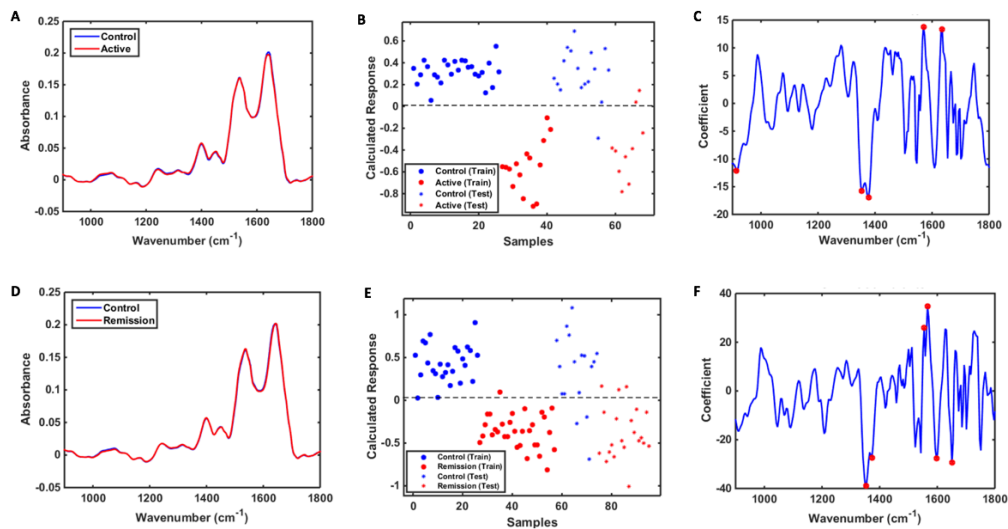

**Figure S3:** ATR-FTIR spectral classification of control groups (CG) vs. active disease (AD) & control groups (CG) vs. disease remission (DR) for plasma samples. CG included healthy controls and disease controls of membranous nephropathy, minimal change disease, immunoglobulin A nephropathy and acute kidney injury with infection. The DR cohort consisted of those in disease remission at the time of enrolment (n=38) in addition to those who achieved disease remission post enrolment following successful remission induction therapy (n=14) – (A) Average pre-processed spectral points for CG (n=450) & patients with AD (n=250) (B) PLS-DA discriminant function graph for classification of CG & AD using cross validation (C) PLS-DA coefficients for identification of main band differences for CG vs. AD (D) Average pre-processed spectral points for CG (n=450) & patients with DR (n=520) (E) PLS-DA discriminant function graph for classification of CG & DR using cross validation (F) PLS-DA coefficients for identification of main band differences for CG vs. DR

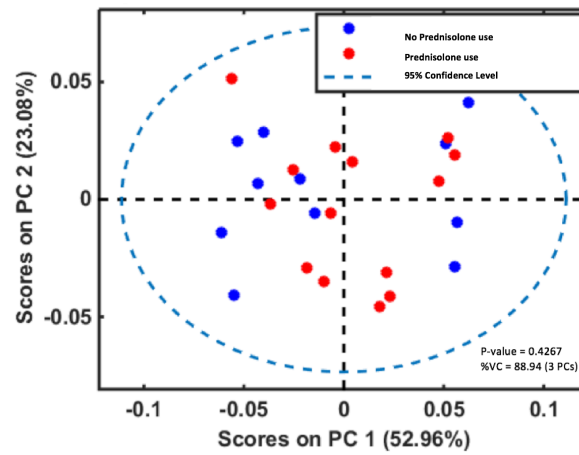

Figure S4: PCA scores plot of prednisolone use (n=14) vs. no prednisolone (n=11) use amongst the active disease cohort

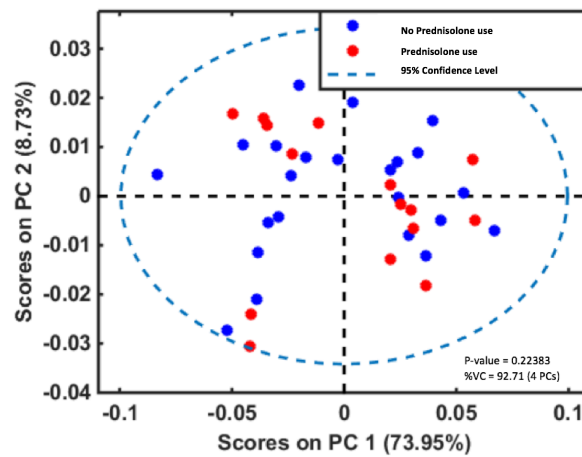

Figure S5: PCA scores plot of  $\geq 5$ mg/day prednisolone use (n=15) vs. no prednisolone use (n=23) amongst the disease remission cohort

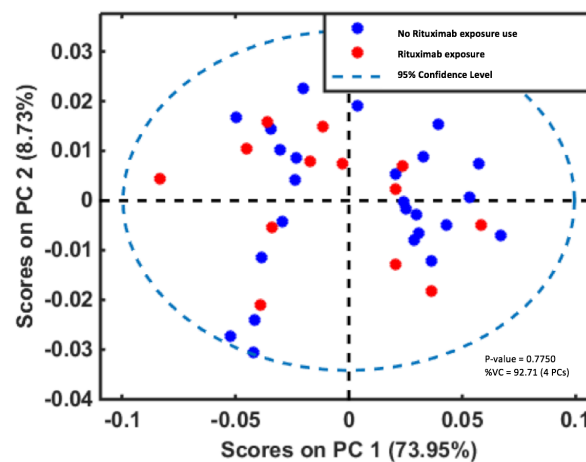

Figure S6: PCA scores plot of Rituximab exposure (n=13) vs. no Rituximab exposure (n=25) in the preceding 6 months amongst the disease remission cohort

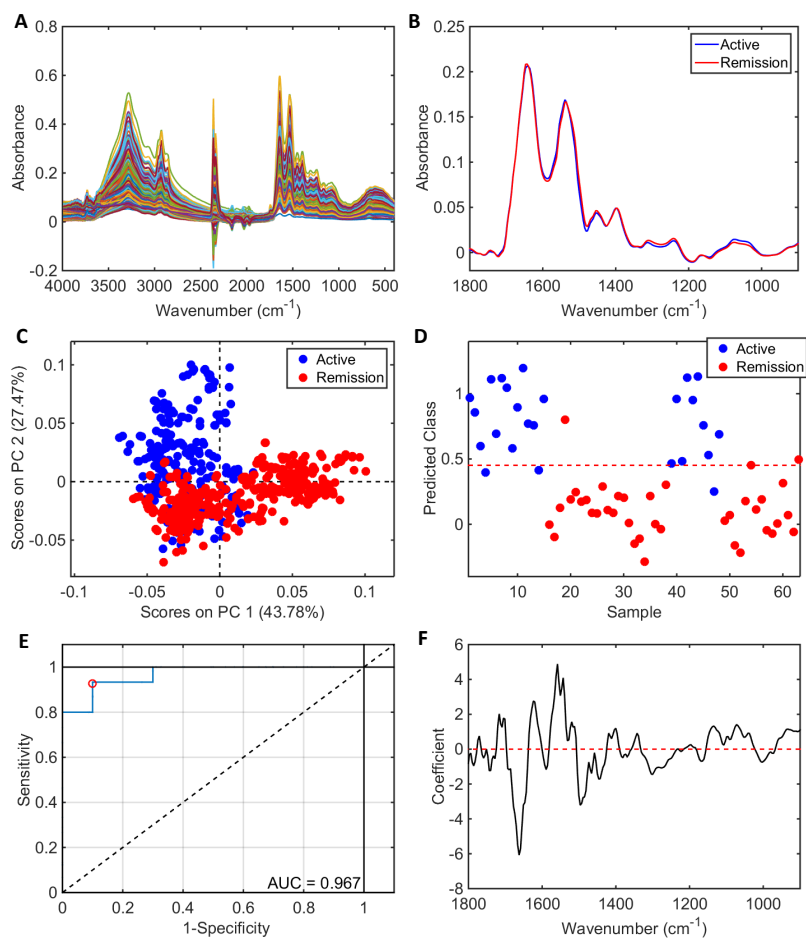

**Figure S7:** ATR-FTIR spectral **classification of active disease vs. disease remission for serum samples** - **(A)** Raw spectral data **(B)** Pre-processed spectra **(C)** PCA scores plot **(D)** PLS-DA discriminant function graph **(E)** ROC curve for PLS-DA **(F)** PLS-DA coefficients for identification of spectral biomarkers

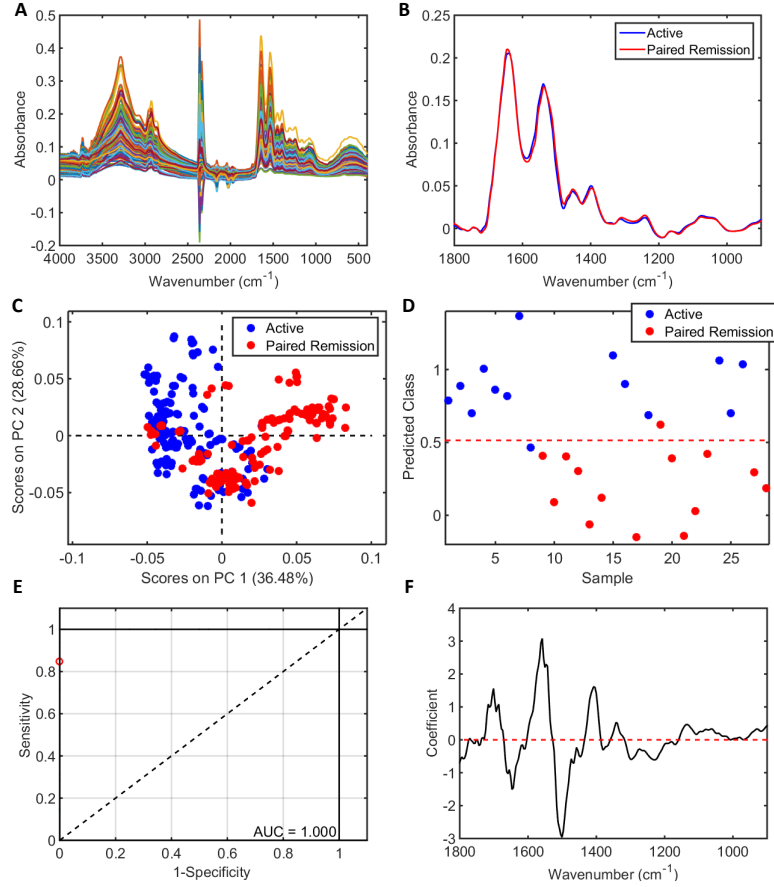

**Figure S8:** ATR-FTIR spectral classification of active disease vs. paired remission for serum samples following successful remission induction therapy - (A) Raw spectral data (B) Pre-processed spectra (C) PCA scores plot (D) PLS-DA discriminant function graph (E) ROC curve for PLS-DA (F) PLS-DA coefficients for identification of spectral biomarkers

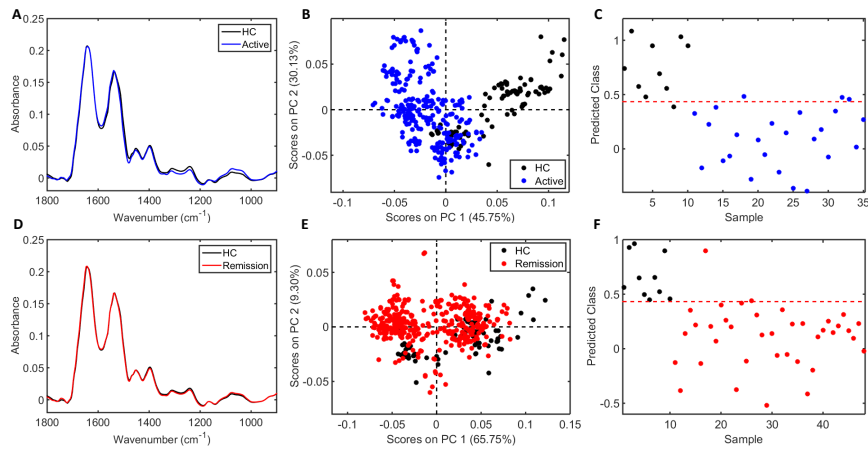

**Figure S9:** ATR-FTIR spectral classification of healthy controls (HC) vs. active disease (AD) & healthy controls (HC) vs. disease remission (DR) for serum samples – (A) Average pre-processed spectral points for HC (n=100) & patients with AD (n=250) (B) PCA scores plot for HC & AD (C) PLS-DA discriminant function graph for classification of HC & AD using cross validation (D) Average pre-processed spectral points for HC (n=100) & DR (n=380) (E) PCA scores plot for HC & DR (F) PLS-DA discriminant function graph for classification of HC & DR using cross validation

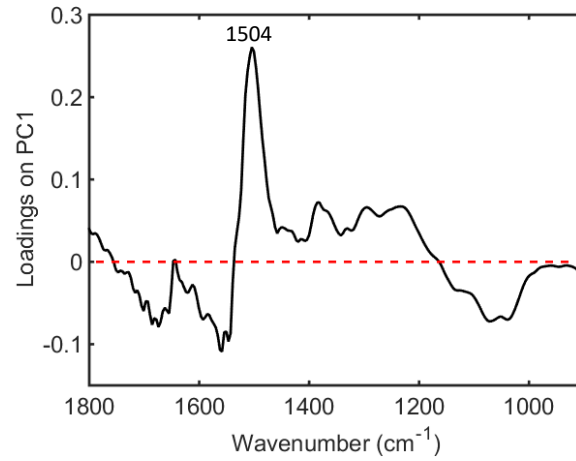

**Figure S10:** Main band differences for healthy controls (HC) vs. active disease (AD) using PCA loadings on PC2 from serum samples - 1504  $\text{cm}^{-1}$  (higher in HC, Amide II).

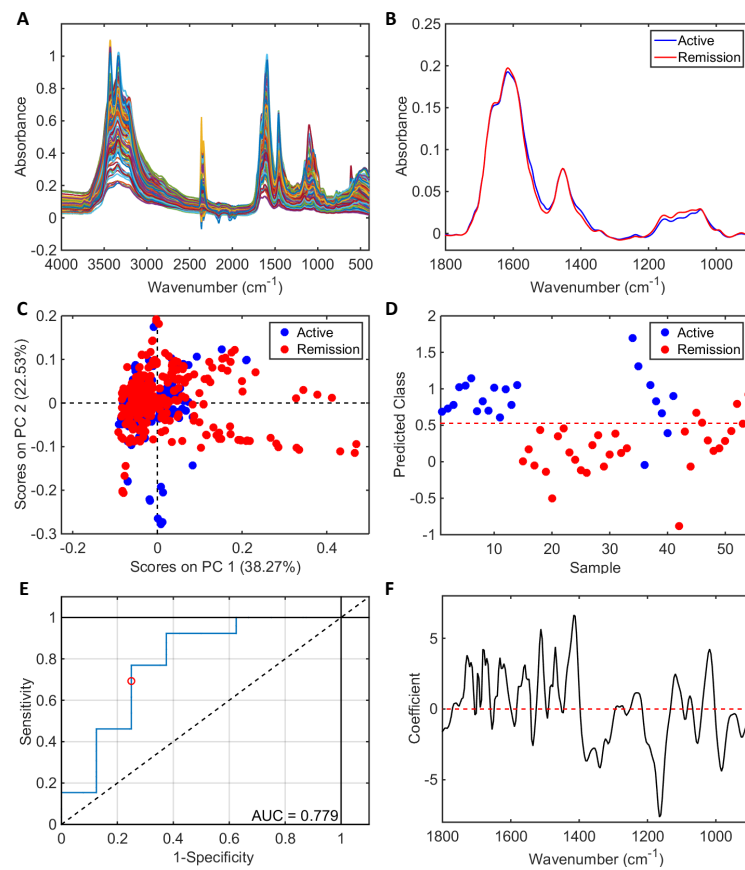

**Figure S11:** ATR-FTIR spectral classification of active disease vs. disease remission for urine samples - (A) Raw spectral data (B) Pre-processed spectra (C) PCA scores plot (D) PLS-DA discriminant function graph (E) ROC curve for PLS-DA (F) PLS-DA coefficients for identification of spectral biomarkers



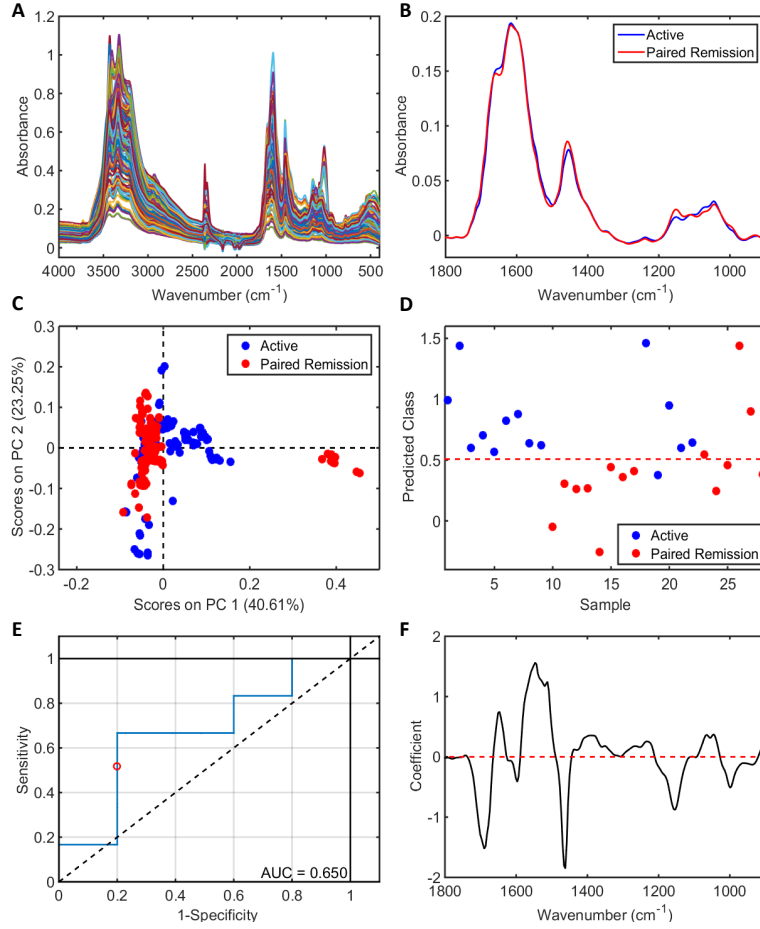

**Figure S12:** ATR-FTIR spectral classification of active disease vs. paired remission for urine samples following successful remission induction therapy - (A) Raw spectral data (B) Pre-processed spectra (C) PCA scores plot (D) PLS-DA discriminant function graph (E) ROC curve for PLS-DA (F) PLS-DA coefficients for identification of spectral biomarkers

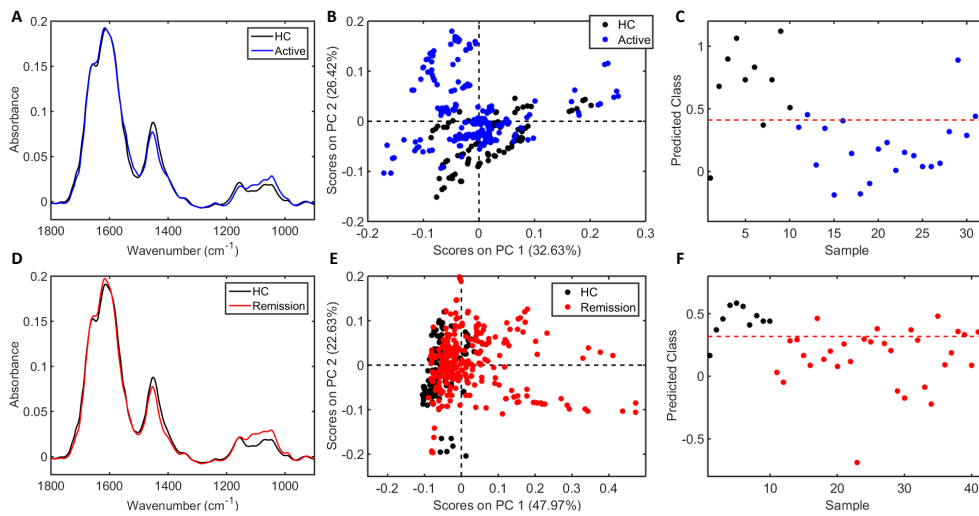

**Figure S13:** ATR-FTIR spectral classification of healthy controls (HC) vs. active disease (AD) & healthy controls (HC) vs. disease remission (DR) for urine samples – (A) Average pre-processed spectral points for HC (n=100) & patients with AD (n=220) (B) PCA scores plot for HC & AD (C) PLS-DA discriminant function graph for classification of HC & AD using cross validation (D) Average pre-processed spectral points for HC (n=100) & DR (n=320) (E) PCA scores plot for HC & DR (F) PLS-DA discriminant function graph for classification of HC & DR using cross validation

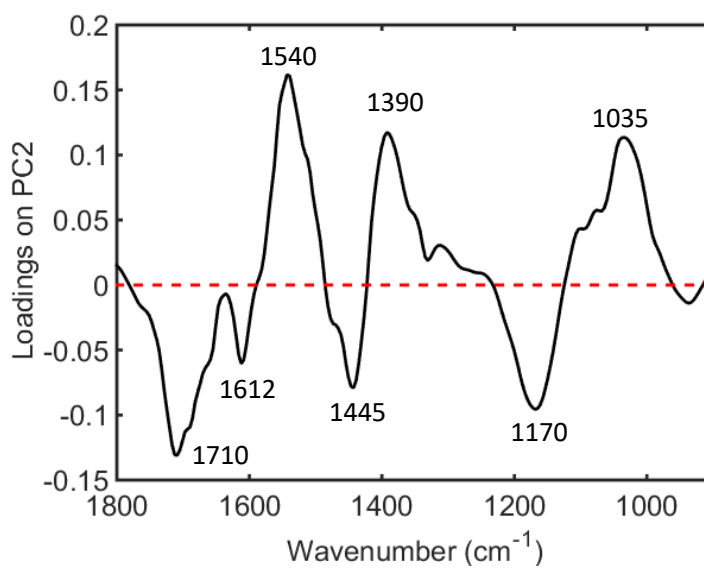

**Figure S14:** Main band differences for healthy controls (HC) vs. active disease (AD) using PCA loadings on PC2 from urine samples - 1710  $\text{cm}^{-1}$  (higher in HC, C=O thymine), 1612  $\text{cm}^{-1}$  (higher in HC, adenine vibration in DNA), 1540  $\text{cm}^{-1}$  (higher in AD, protein amide II absorption  $\beta$ -sheet), 1445  $\text{cm}^{-1}$  (higher in HC,  $\delta(\text{CH}_2)$  in lipids or fatty acids), 1390  $\text{cm}^{-1}$  (higher in AD,  $\text{CH}_3$  bending), 1170  $\text{cm}^{-1}$  (higher in HC,  $\nu_{\text{as}}(\text{CO-O-C})$ ), 1035  $\text{cm}^{-1}$  (higher in AD, skeletal *trans*  $\nu(\text{C-C})$  of DNA).

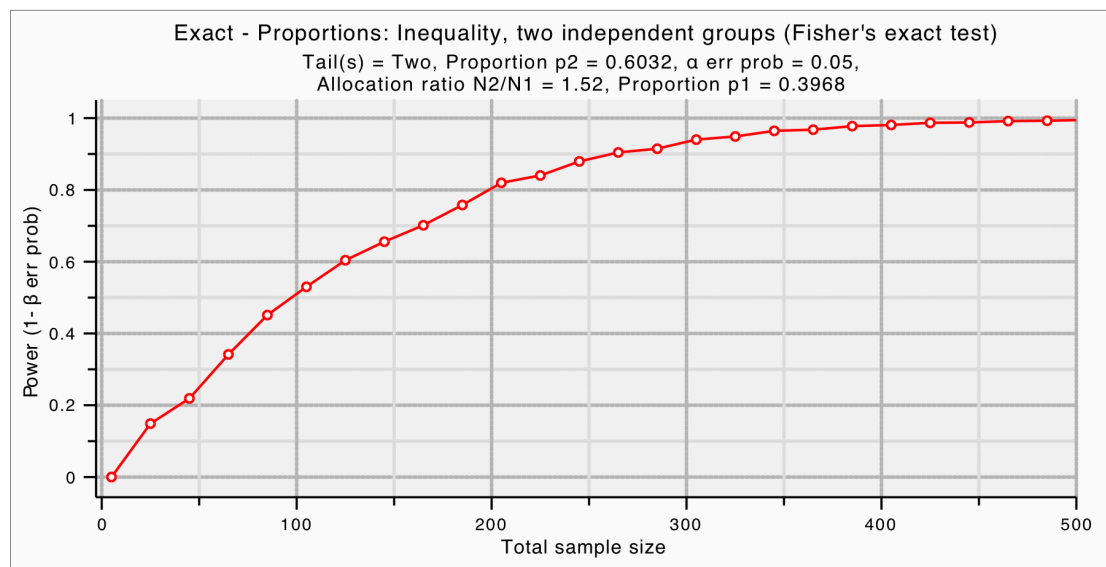

**Figure S15:** Power test based on a Fisher's exact test (two-tails, error probability = 0.05) showing the power varying the total sample size of active and remission cases.

| Table S1: Characteristics of disease control groups at the time of enrolment & sample collection |              |              |               |               |
|--------------------------------------------------------------------------------------------------|--------------|--------------|---------------|---------------|
|                                                                                                  | MM<br>(n=10) | MCD<br>(n=5) | IgA<br>(n=10) | AKI<br>(n=10) |
| Mean Age (SD)                                                                                    | 63 ± 9.4     | 50 ± 21.9    | 48 ± 12.9     | 71 ± 8.7      |
| Sex                                                                                              |              |              |               |               |
| Male                                                                                             | 8            | 2            | 8             | 6             |
| Female                                                                                           | 2            | 3            | 2             | 4             |
| Median serum creatinine (μmol/L)                                                                 | 103 (181-84) | 81 (137-72)  | 212 (258-109) | 330 (365-285) |
| Median eGFR (mls/min/1.73m <sup>2</sup> )                                                        | 59 (60-32)   | 90 (90-35)   | 27 (74-22)    | 13 (14-12)    |
| Other Laboratory Salient Laboratory Results:                                                     |              |              |               |               |
| Mean Haemoglobin (g/L)                                                                           | 121 ± 12.9   | 133 ± 14.2   | 128 ± 17.9    | 93 ± 13       |
| Mean White cell count (10 <sup>9</sup> /L)                                                       | 6 ± 2.2      | 9 ± 4.2      | 7 ± 2.4       | 8 ± 4.2       |
| Mean Lymphocyte count (10 <sup>9</sup> /L)                                                       | 1.7 ± 0.6    | 1.8 ± 0.6    | 1.7 ± 0.5     | 0.9 ± 0.5     |
| Mean Neutrophil count (10 <sup>9</sup> /L)                                                       | 4 ± 1.6      | 6 ± 4.3      | 5 ± 2.2       | 6 ± 3.8       |
| Mean Platelet count (10 <sup>9</sup> /L)                                                         | 258 ± 84.7   | 291 ± 13.7   | 260 ± 49.7    | 253 ± 95      |
| Median CRP (mg/L)                                                                                | *            | *            | *             | 83 (122-47)   |

MM, Membranous Nephropathy; MCD, Minimal Change Disease; IgA, Immunoglobulin A Nephropathy; AKI, Acute Kidney Injury

| Table S2: Classification parameters for plasma samples in healthy controls (HC) vs. active disease (AD) and disease remission (DR) |              |                 |                 |             |
|------------------------------------------------------------------------------------------------------------------------------------|--------------|-----------------|-----------------|-------------|
|                                                                                                                                    | Accuracy (%) | Sensitivity (%) | Specificity (%) | F-Score (%) |
| <b>HC vs. AD</b>                                                                                                                   |              |                 |                 |             |
| Training (4 LVs)                                                                                                                   | 94.0         | 88.0            | 100             | 93.6        |
| Cross-validation                                                                                                                   | 82.0         | 84.0            | 80.0            | 82.0        |
| <b>HC vs. DR</b>                                                                                                                   |              |                 |                 |             |
| Training (3 LVs)                                                                                                                   | 92.3         | 94.7            | 90.0            | 92.3        |
| Cross-validation                                                                                                                   | 81.0         | 92.1            | 70.0            | 79.5        |

| Table S3: Classification parameters for plasma samples for control groups (CG) vs. active disease (AD) and all disease remission (DR) |              |                 |                 |             |
|---------------------------------------------------------------------------------------------------------------------------------------|--------------|-----------------|-----------------|-------------|
|                                                                                                                                       | Accuracy (%) | Sensitivity (%) | Specificity (%) | F-Score (%) |
| <b>CG vs. AD</b>                                                                                                                      |              |                 |                 |             |
| Training (7 LVs)                                                                                                                      | 100          | 100             | 100             | 100         |
| Cross-validation                                                                                                                      | 93           | 93              | 92              | 92          |
| Test                                                                                                                                  | 89           | 80              | 94              | 86          |
| <b>CG vs. DR</b>                                                                                                                      |              |                 |                 |             |
| Training (9 LVs)                                                                                                                      | 98           | 97              | 100             | 98          |
| Cross-validation                                                                                                                      | 86           | 87              | 85              | 86          |
| Test                                                                                                                                  | 84           | 86              | 82              | 84          |

**Table S4: Comparative analysis between clinical variables and ATR-FTIR spectral data from plasma samples**

| Disease Remission                      | Sensitivity of clinical variable | Specificity of clinical variable | Coefficients of determination ( $R^2$ ) |
|----------------------------------------|----------------------------------|----------------------------------|-----------------------------------------|
| Age                                    | -                                | -                                | 0.03                                    |
| Gender                                 | 0.55                             | 0.61                             | 0                                       |
| ANCA Serotype                          |                                  |                                  |                                         |
| MPO                                    | 0.61                             | 0.2                              | 0.06                                    |
| PR3                                    | 0.21                             | 0.8                              | 0.02                                    |
| Negative                               | 0.67                             | 0.53                             | 0.01                                    |
| ANCA titre                             | -                                | -                                | 0.05                                    |
| Serum creatinine ( $\mu\text{mol/L}$ ) | -                                | -                                | 0.43                                    |
| eGFR( $\text{mls/min/1.73m}^2$ )       | -                                | -                                | 0.3                                     |
| Haemoglobin                            | -                                | -                                | 0.26                                    |
| White cell count                       | -                                | -                                | 0.01                                    |
| Lymphocyte count                       | -                                | -                                | 0                                       |
| Neutrophil count                       | -                                | -                                | 0                                       |
| Platelet count                         | -                                | -                                | 0.01                                    |
| CRP                                    | -                                | -                                | 0                                       |
| ESR                                    | -                                | -                                | 0.16                                    |
| Serum albumin                          | -                                | -                                | 0.1                                     |
| Total Protein                          | -                                | -                                | 0.45                                    |

**Table S5: Classification parameters for serum samples in active disease (AD) vs. disease remission (DR)**

| AD vs. DR        | Accuracy (%) | Sensitivity (%) | Specificity (%) | F-Score (%) |
|------------------|--------------|-----------------|-----------------|-------------|
| Training (4 LVs) | 91.2         | 95.7            | 86.7            | 91.0        |
| Cross-validation | 91.2         | 95.7            | 86.7            | 91.0        |
| Test             | 88.3         | 86.7            | 90.0            | 88.3        |

**Table S6: Classification parameters for serum samples in active disease (AD) vs. paired remission (PR)**

| AD vs. PR        | Accuracy (%) | Sensitivity (%) | Specificity (%) | F-Score (%) |
|------------------|--------------|-----------------|-----------------|-------------|
| Training (2 LVs) | 95.0         | 100             | 90.0            | 94.7        |
| Cross-validation | 95.0         | 100             | 90.0            | 94.7        |
| Test             | 92.8         | 85.7            | 100             | 92.3        |

| Table S7: Comparative analysis between clinical variables and ATR-FTIR spectral data from serum samples |                                  |                                  |                                         |
|---------------------------------------------------------------------------------------------------------|----------------------------------|----------------------------------|-----------------------------------------|
| Active disease                                                                                          | Sensitivity of clinical variable | Specificity of clinical variable | Coefficients of determination ( $R^2$ ) |
| Age                                                                                                     | -                                | -                                | 0.15                                    |
| Gender                                                                                                  | 0.75                             | 0.69                             | 0.24                                    |
| BVAS                                                                                                    | -                                | -                                | 0.13                                    |
| Organ involvement:                                                                                      |                                  |                                  |                                         |
| Constitutional signs or symptoms                                                                        | 0.75                             | 0.40                             | 0.24                                    |
| Mucous Membrane / Ophthalmic                                                                            | 0.50                             | 0.58                             | 0.00                                    |
| Cutaneous                                                                                               | 0.92                             | 1.00                             | 0.02                                    |
| ENT                                                                                                     | 0.33                             | 0.31                             | 0.23                                    |
| Respiratory                                                                                             | 0.83                             | 0.63                             | 0.03                                    |
| Cardiovascular                                                                                          | 1.00                             | 1.00                             | 0.01                                    |
| Renal                                                                                                   | 1.00                             | 1.00                             | 0.54                                    |
| Neurological                                                                                            | 0.40                             | 0.65                             | 0.00                                    |
| ANCA Positivity                                                                                         | 0.91                             | 0.75                             | 0.22                                    |
| ANCA Serotype                                                                                           |                                  |                                  |                                         |
| MPO                                                                                                     | 0.33                             | 0.81                             | 0.00                                    |
| PR3                                                                                                     | 0.75                             | 0.54                             | 0.00                                    |
| Negative                                                                                                | 0.75                             | 0.86                             | 0.22                                    |
| ANCA titre                                                                                              | -                                | -                                | 0.06                                    |
| Serum creatinine ( $\mu\text{mol/L}$ )                                                                  | -                                | -                                | 0.28                                    |
| eGFR( $\text{mls/min/1.73m}^2$ )                                                                        | -                                | -                                | 0.44                                    |
| Haemoglobin                                                                                             | -                                | -                                | 0.54                                    |
| White cell count                                                                                        | -                                | -                                | 0.01                                    |
| Lymphocyte count                                                                                        | -                                | -                                | 0.21                                    |
| Neutrophil count                                                                                        | -                                | -                                | 0.04                                    |
| Platelet count                                                                                          | -                                | -                                | 0.15                                    |
| CRP                                                                                                     | -                                | -                                | 0.28                                    |
| ESR                                                                                                     | -                                | -                                | 0.00                                    |

ENT, ear nose and throat; ANCA, anti-neutrophil cytoplasmic autoantibody; MPO, myeloperoxidase; PR3, proteinase-3; BVAS, Birmingham vasculitis activity score; eGFR, estimated glomerular filtration rate; ESR, erythrocyte sedimentary rate; CRP, C-reactive protein

| Table S8: Classification parameters for serum samples in healthy controls (HC) vs. active disease (AD) and disease remission (DR) |              |                 |                 |             |
|-----------------------------------------------------------------------------------------------------------------------------------|--------------|-----------------|-----------------|-------------|
|                                                                                                                                   | Accuracy (%) | Sensitivity (%) | Specificity (%) | F-Score (%) |
| <b>HC vs. AD</b>                                                                                                                  |              |                 |                 |             |
| Training (3 LVs)                                                                                                                  | 100          | 100             | 100             | 100         |
| Cross-validation                                                                                                                  | 89.0         | 88.0            | 90.0            | 89.0        |
| <b>HC vs. DR</b>                                                                                                                  |              |                 |                 |             |
| Training (3 LVs)                                                                                                                  | 98.7         | 97.4            | 100             | 98.7        |
| Cross-validation                                                                                                                  | 97.3         | 94.7            | 100             | 97.3        |

**Table S9: Potential spectral biomarkers for distinguishing active disease and disease remission using serum samples based on the PLS-DA coefficients ( $\nu$  = stretching;  $\delta$  = bending)**

| Wavenumber (cm <sup>-1</sup> ) | Tentative assignment                                              | Influence on Active AAV |
|--------------------------------|-------------------------------------------------------------------|-------------------------|
| 1716                           | $\nu$ (C=O) DNA/RNA                                               | ↑                       |
| 1704                           | $\nu$ (C=O) thymine                                               | ↑                       |
| 1662                           | Amide I                                                           | ↓                       |
| 1623                           | Base carbonyl stretching and ring breathing mode of nucleic acids | ↑                       |
| 1558                           | Ring base                                                         | ↑                       |
| 1543                           | Amide II                                                          | ↑                       |
| 1495                           | $\nu$ (C=C), $\delta$ (C-H)                                       | ↓                       |
| 1701                           | C=O guanine                                                       | ↑                       |
| 1646                           | Amide I                                                           | ↓                       |
| 1558                           | Ring base mode                                                    | ↑                       |
| 1500                           | Amide II                                                          | ↓                       |
| 1407                           | CH <sub>3</sub> asymmetric deformation                            | ↑                       |

**Table S10: Classification parameters for urine samples in active disease (AD) vs. disease remission (DR)**

| AD vs. DR        | Accuracy (%) | Sensitivity (%) | Specificity (%) | F-Score (%) |
|------------------|--------------|-----------------|-----------------|-------------|
| Training (7 LVs) | 100          | 100             | 100             | 100         |
| Cross-validation | 82.3         | 78.9            | 85.7            | 82.2        |
| Test             | 72.1         | 69.2            | 75.0            | 72.0        |

**Table S11: Classification parameters for urine samples in active disease (AD) vs. paired remission (PR)**

| AD vs. PR        | Accuracy (%) | Sensitivity (%) | Specificity (%) | F-Score (%) |
|------------------|--------------|-----------------|-----------------|-------------|
| Training (2 LVs) | 100          | 100             | 100             | 100         |
| Cross-validation | 75.7         | 62.5            | 88.9            | 73.4        |
| Test             | 65.0         | 50.0            | 80.0            | 61.5        |

| Table S12: Comparative analysis between clinical variables and ATR-FTIR spectral data from urine samples |                                  |                                  |                                                 |
|----------------------------------------------------------------------------------------------------------|----------------------------------|----------------------------------|-------------------------------------------------|
| Active disease                                                                                           | Sensitivity of clinical variable | Specificity of clinical variable | Coefficients of determination (R <sup>2</sup> ) |
| Age                                                                                                      | -                                | -                                | 0.01                                            |
| Gender                                                                                                   | 0.7                              | 0.3                              | 0.00                                            |
| BVAS                                                                                                     | -                                | -                                | 0.17                                            |
| <b>Organ involvement:</b>                                                                                |                                  |                                  |                                                 |
| Constitutional signs or symptoms                                                                         | 0.2                              | 0.6                              | 0.10                                            |
| Mucous Membrane / Ophthalmic                                                                             | 0.4                              | 0.4                              | 0.03                                            |
| Cutaneous                                                                                                | 0.8                              | 1.0                              | 0.05                                            |
| ENT                                                                                                      | 0.6                              | 0.7                              | 0.12                                            |
| Respiratory                                                                                              | 0.3                              | 0.8                              | 0.00                                            |
| Cardiovascular                                                                                           | 1.0                              | 0.9                              | 0.00                                            |
| Renal                                                                                                    | 0.7                              | 0.4                              | 0.01                                            |
| Neurological                                                                                             | 0.2                              | 0.9                              | 0.01                                            |
| <b>ANCA Positivity</b>                                                                                   | 0.7                              | 0.6                              | 0.05                                            |
| <b>ANCA Serotype</b>                                                                                     |                                  |                                  |                                                 |
| MPO                                                                                                      | 0.5                              | 0.9                              | 0.15                                            |
| PR3                                                                                                      | 0.9                              | 0.3                              | 0.01                                            |
| Negative                                                                                                 | 0.6                              | 0.6                              | 0.04                                            |
| <b>ANCA titre</b>                                                                                        | -                                | -                                | 0.05                                            |
| <b>Serum creatinine (µmol/L)</b>                                                                         | -                                | -                                | 0.02                                            |
| <b>eGFR(mls/min/1.73m<sup>2</sup>)</b>                                                                   | -                                | -                                | 0.02                                            |
| <b>Haemoglobin</b>                                                                                       | -                                | -                                | 0.00                                            |
| <b>White cell count</b>                                                                                  | -                                | -                                | 0.24                                            |
| <b>Lymphocyte count</b>                                                                                  | -                                | -                                | 0.00                                            |
| <b>Neutrophil count</b>                                                                                  | -                                | -                                | 0.32                                            |
| <b>Platelet count</b>                                                                                    | -                                | -                                | 0.06                                            |
| <b>CRP</b>                                                                                               | -                                | -                                | 0.41                                            |
| <b>ESR</b>                                                                                               | -                                | -                                | 0.24                                            |
| <b>uPCR</b>                                                                                              | -                                | -                                | 0.46                                            |
| <b>Urine white cell count</b>                                                                            | -                                | -                                | 0.01                                            |
| <b>Bacterial growth</b>                                                                                  |                                  |                                  |                                                 |
| No growth (n=19)                                                                                         | 0.8                              | 0.0                              | 0.01                                            |
| <i>Streptococcus agalactiae</i> (n=1)                                                                    | 1.0                              | 0.9                              | 0.00                                            |
| <i>Enterococcus faecalis</i> (n=1)                                                                       | 1.0                              | 0.9                              | 0.01                                            |
| Mixed growth (n=1)                                                                                       | 1.0                              | 0.9                              | 0.00                                            |

ENT, ear nose and throat; ANCA, anti-neutrophil cytoplasmic autoantibody; MPO, myeloperoxidase; PR3, proteinase-3; BVAS, Birmingham vasculitis activity score; eGFR, estimated glomerular filtration rate; ESR, erythrocyte sedimentary rate; CRP, C-reactive protein; uPCR, urine protein creatinine ratio; bacterial growth n=3

**Table S13: Classification parameters for urine samples in healthy controls (HC) vs. active disease (AD) and disease remission (DR)**

|                  | Accuracy (%) | Sensitivity (%) | Specificity (%) | F-Score (%) |
|------------------|--------------|-----------------|-----------------|-------------|
| <b>HC vs. AD</b> |              |                 |                 |             |
| Training (3 LVs) | 92.7         | 95.5            | 90.0            | 92.7        |
| Cross-validation | 85.4         | 90.9            | 80.0            | 85.1        |
| <b>HC vs. DR</b> |              |                 |                 |             |
| Training (1 LVs) | 84.0         | 78.1            | 90.0            | 83.6        |
| Cross-validation | 85.6         | 81.3            | 90.0            | 85.4        |

**Table S14: Potential spectral biomarkers for distinguishing active disease and disease remission using urine samples based on the PLS-DA coefficients ( $\nu$  = stretching;  $\delta$  = bending)**

| Wavenumber (cm <sup>-1</sup> ) | Tentative assignment                                                     | Influence on Active AAV |
|--------------------------------|--------------------------------------------------------------------------|-------------------------|
| 1728                           | $\nu$ (C=O)                                                              | ↑                       |
| 1680                           | Amide I                                                                  | ↑                       |
| 1632                           | $\nu$ (C=C) uracil                                                       | ↑                       |
| 1512                           | In-plane $\delta$ (CH) phenyl ring                                       | ↑                       |
| 1470                           | $\delta$ (CH <sub>2</sub> ) methylene chains in lipids                   | ↑                       |
| 1415                           | $\delta$ (C-H), $\delta$ (NH), $\nu$ (C-N)                               | ↑                       |
| 1380                           | $\delta$ (CH <sub>3</sub> )                                              | ↓                       |
| 1339                           | Collagen                                                                 | ↓                       |
| 1164                           | $\nu$ (C-O) of C-OH groups of serine, threonine and tyrosine of proteins | ↓                       |
| 1020                           | DNA                                                                      | ↑                       |
| 984                            | OCH <sub>3</sub> polysaccharides                                         | ↓                       |
| 1689                           | Base carbonyl stretching and ring breathing mode of nucleic acids        | ↓                       |
| 1647                           | Amide I                                                                  | ↑                       |
| 1546                           | Amide II of proteins                                                     | ↑                       |
| 1512                           | In-plane CH bending from phenyl rings                                    | ↑                       |
| 1460                           | $\delta_{as}$ (CH <sub>3</sub> ) collagen                                | ↓                       |
| 1155                           | C-O stretching                                                           | ↓                       |
